# Supplementary material
Source: publisher site journal article supplement (https://www.dovepress.com/article/532807)
Supplement: Supplementary file 1 [file 532807%20Revised%20Supplementary%20Material.docx]

**Supplementary Material**

**Table S1 Primer sequences of Real Time Quantitative PCR (RT-qPCR) used in this study**

| **Strains** | **Target (subtypes)** | **Primer name** | **Sequence**  **(5’to 3’direction)** | **Reference** |
| --- | --- | --- | --- | --- |
| *E. coli*  DC 11722 | *csgA* | *csgA-*F | CAGATGTTGGTCAGGGCTCAGATG | 1 |
| *csgA-*R | CCGCCACCGAATTGTTTAACTGTC |
| *csgD* | *csgD-*F | TGATGAACAACGAACGAGCGATCTC |
| *csgD-*R | GCTTGCCAGTTACCTGATTACACATTC |
| *flhC* | *flhC-*F | ATGCTGCCATTCTCAACCGACTG |
| *flhC-*R | CGCATCGACGCCATTACACAAAC |
| *lsrB* | *lsrB-*F | AGTGCTGACCTGGGACTCTGATAC |
| *lsrB-*R | GCCATATCCACCAACATACCTCCTAAC |
| *16S rRNA* | *16S rRNA-*F | CTAATACCGCATAATGTCGC |
| *16S rRNA-*R | TGTGGCTGGTCATCCTCT |
| 1. *Pneumoniae*   FK 6793 | *wzm* | *wzm-*F | CTATCGAAGACGTATCCTTTAC | 2 |
| *wzm-*R | ATATTCTCACGCCCGGTAAG |
| *wbbM* | *wbbM-*F | TTATCAGGCTGCCATTGCCAT |
| *wbbM-*R | CAGCTATATGCCCAATAACGC |
| *mrkA* | *mrkA-*F | AGCGATGCGAACGTTTACCTGTCTC |
| *mrkA-*R | CGTCATCCTGTTTAGTGCCATCAGC |
| *pgaA* | *pgaA-*F | GCAGACGCTCTCCTATGTC |
| *pgaA-*R | GCCGAGAGCAGGGGAATC |
| *16S rRNA* | *16S rRNA-*F | CTAATACCGCATAATGTCGC |
| *16S rRNA-*R | TGTGGCTGGTCATCCTCT |

**Table S2 Information list of clinical isolates**

| **Species** | **Strains** | **Isolates resources** | **Specimen types** | **Antimicrobial resistance**  **mechanism** | **MIC (μg/mL)** | | | **Application** |
| --- | --- | --- | --- | --- | --- | --- | --- | --- |
| **IPM** | **MEM** | **ETP** |
| *Escherichia coli* | DC5113 | Wenzhou, China | Blood | KPC-2,TEM,CTX-M-1,CTX-M-9 | 8 | 16 | 128 | This study |
| DC8647 | Wenzhou, China | Drainage fluid | NDM | 8 | 32 | 128 | This study |
| DC10494 | Wenzhou, China | Urine | NDM | 2 | 2 | 8 | This study |
| DC10694 | Wenzhou, China | Pus | CTX-M-1,CTX-M-9,TEM,SHV | 1 | 0.5 | 256 | This study |
| DC11722 | Wenzhou, China | Sputum | KPC-2,OXA-1,CMY-42 | 32 | 128 | 512 | This study |
| ATCC25922 | USA (ATCC)3 | Clinical isolates | Control strain for drug susceptibility testing | <0.25 | <0.25 | <0.25 | This study |
| *Klebsiella pneumoniae* | FK3006 | Wenzhou, China | Blood | KPC-2,IMP | 32 | 128 | 256 | This study |
| FK6709 | Wenzhou, China | Sputum | KPC-2,OXA-23 | 32 | 64 | 256 | This study |
| FK6793 | Wenzhou, China | Sputum | KPC-2 | 128 | 128 | 512 | This study |
| FK7112 | Wenzhou, China | Feces | KPC-2,OmpK37mutation | 64 | 128 | 512 | This study |
| FK7513 | Wenzhou, China | Catheter | NDM | 32 | 64 | 128 | This study |
| *Klebsiella quasipneumoniae* | ATCC700603 | USA (ATCC)4 | Urine | Control strain for drug susceptibility testing | 1 | <0.25 | 2 | This study |
| *Enterobacter cloacae* | CG1249 | Wenzhou, China | Drainage fluid | AmpC, impermeability | 0.5 | 1 | 128 | This study |
| CG1330 | Wenzhou, China | Drainage fluid | NDM | 8 | 16 | 128 | This study |
| CG1381 | Wenzhou, China | Sputum | OXA-23 | 32 | 32 | 64 | This study |
| CG1778 | Wenzhou, China | Sputum | NDM,efflux pump | 8 | 16 | 32 | This study |
| CG1813 | Wenzhou, China | Drainage fluid | IMP, efflux pump | 8 | 16 | 128 | This study |

**Table S3 Fractional inhibitory concentration index (FICI) for Au NPs and DDM against CRE strians**

| **Strains** | **MIC of Monotherapy (μg/mL)** | | **MIC of combination (μg/mL)** | | **FICI** | **Interpretation b** |
| --- | --- | --- | --- | --- | --- | --- |
| **Au NPs** | **DDM a** | **Au NPs** | **DDM** |
| DC11722 | ≥256 | ≥256 | ≥256 | ≥256 | 2 | indifference |
| DC8647 | ≥256 | ≥256 | ≥256 | ≥256 | 2 | indifference |
| FK6793 | ≥256 | ≥256 | ≥256 | ≥256 | 2 | indifference |
| FK3006 | ≥256 | ≥256 | ≥256 | ≥256 | 2 | indifference |
| CG1778 | ≥256 | ≥256 | ≥256 | ≥256 | 2 | indifference |
| CG1381 | ≥256 | ≥256 | ≥256 | ≥256 | 2 | indifference |

a DDM, Dichlorophen;

b Indifference, FICI = 0.5-4.

**Table S4 Antimicrobial activity of DDM_Au NPs before and after using quercetin against CRE isolates used in this study**

| **Strains** | **Before MIC (μg/mL)** | **After MIC (μg/mL)** |
| --- | --- | --- |
| DC8647 | 8 | 32 |
| DC11722 | 4 | 32 |
| FK3006 | 8 | 128 |
| FK6793 | 16 | ≥256 |
| CG1778 | 8 | 32 |
| CG1381 | 4 | 32 |


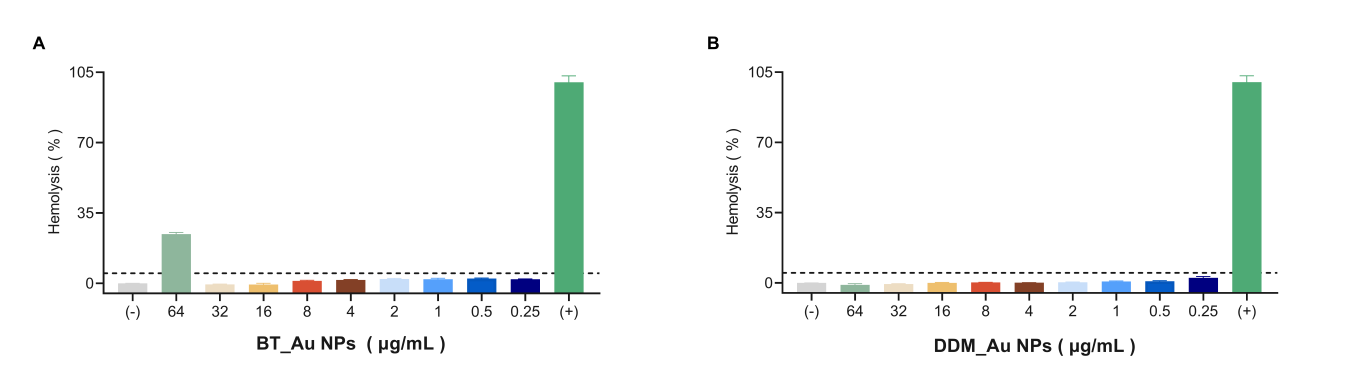


**Figure S1. Results of red blood cell hemolysis test.** (A) Effects of BT_AuNPs on red blood cells; (B) Hemolytic effects of DDM_Au NPs on red blood cells. The figure shows (−) as the negative control, (+) as the positive control, and a hemolysis rate of <5% (indicated by the dashed line) is considered a negative result.

**
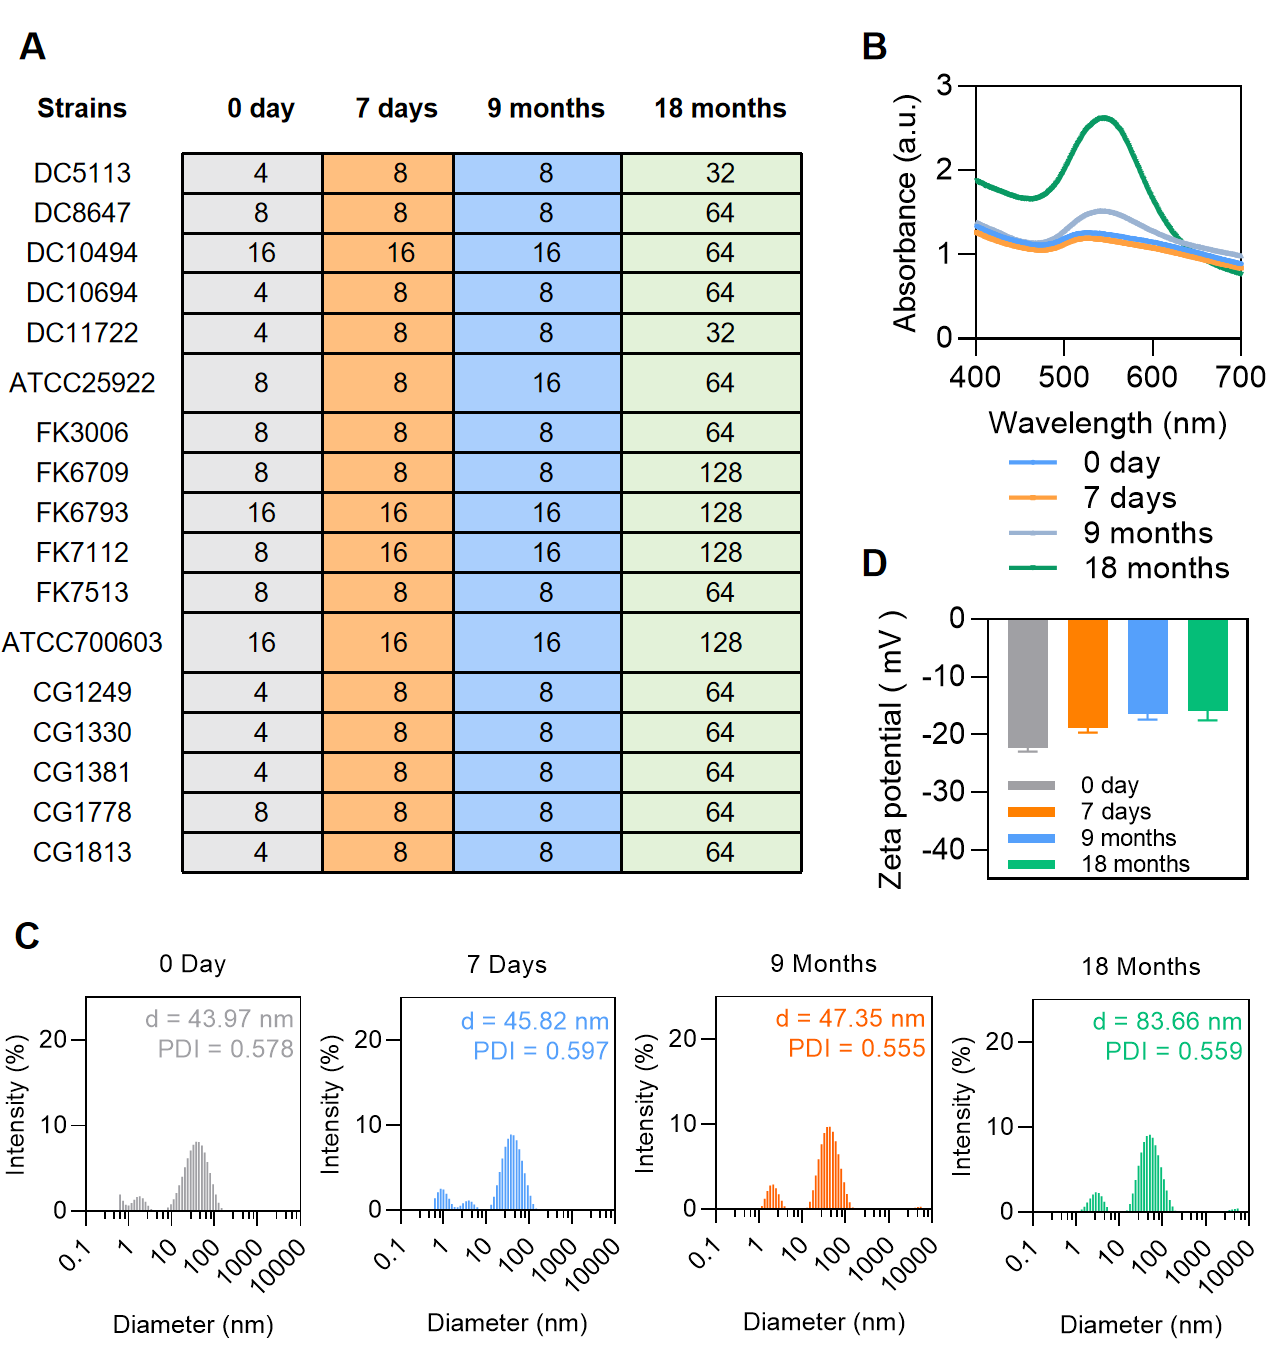
**

**Figure S2. Long-term stability and antibacterial performance of DDM_Au NPs.** (A) MIC changes of DDM_Au NPs against CRE clinical isolates and standard strains after different storage durations. (B) UV–vis absorption spectra of DDM_Au NPs over time. (C) Changes in particle size and polydispersity index (PDI). (D) Variation in zeta potential during storage.

**
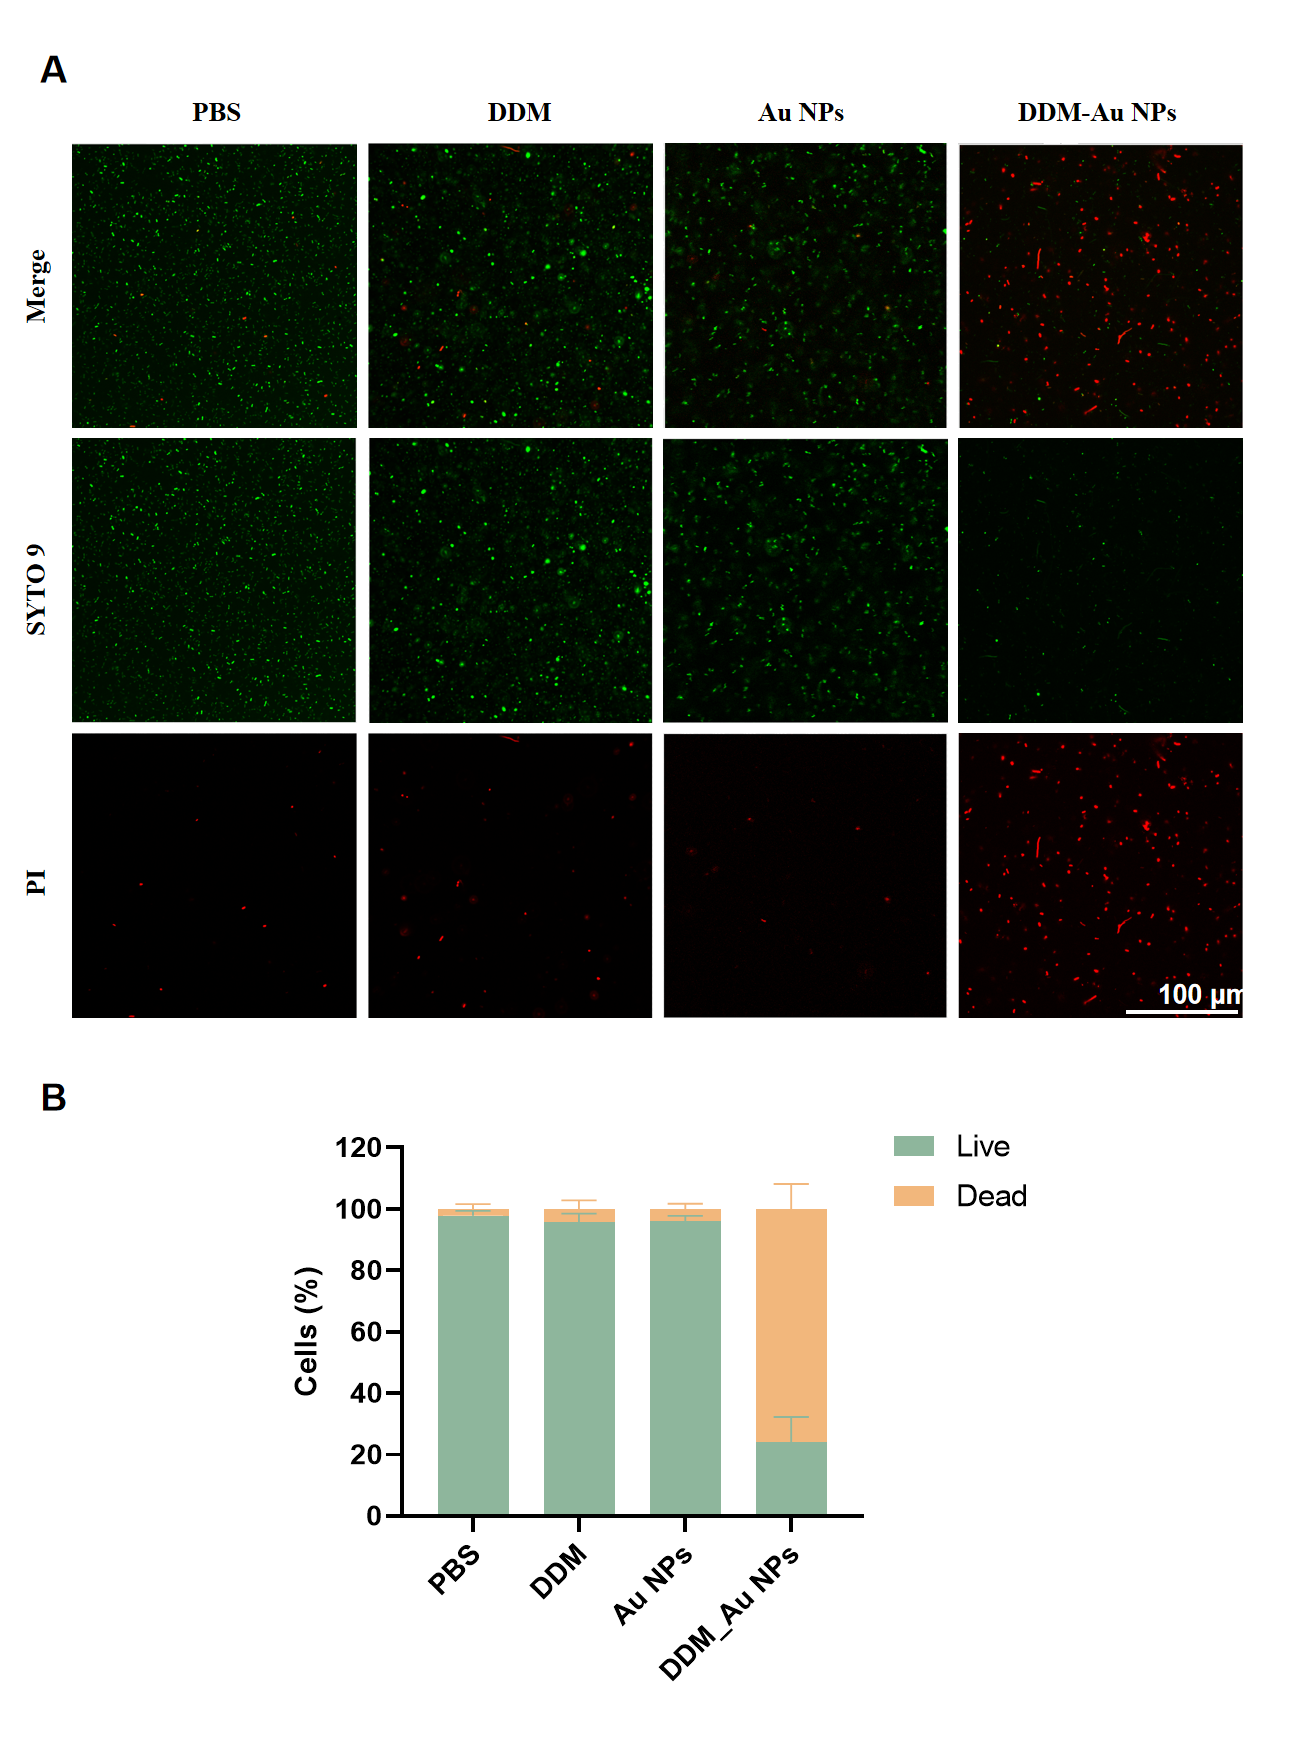
**

**Figure S3. SYTO 9/PI staining of bacteria in biofilm with various treatments.** (A) Representative fluorescence imagesM (live cells, green fluorescence) and PI (dead cells, red fluorescence); (B) Quantification of SYTO 9/PI fluorescence ratios. The data are shown as mean ± SD (n = 3).

**
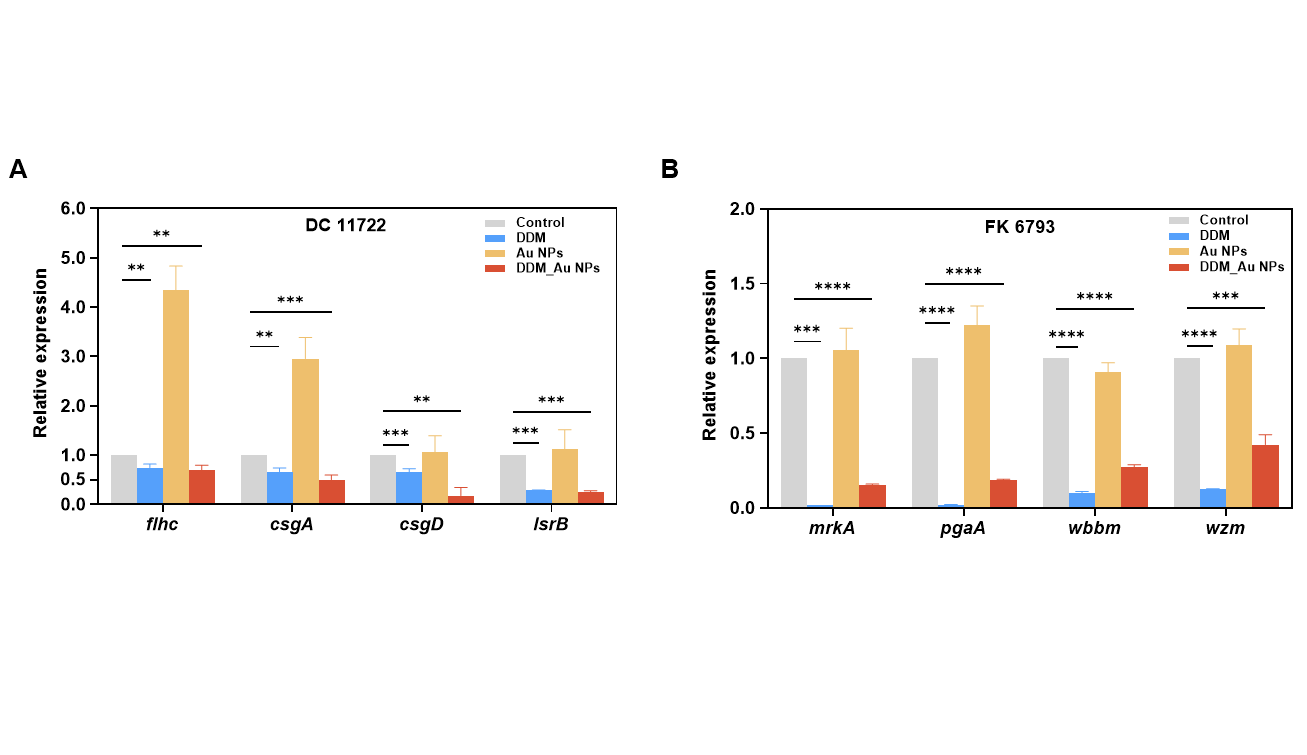
Figure S4. RT qPCR results of biofilm related genes** (A) Expression of biofilm-related genes in *E.coli,* includes regulatory genes for curli pili generation system (*csgA*, *csgD*), flagella formation genes (*flhC*), and quorum sensing-related genes (*lsrB*); (B) Expression of biofilm-related genes in *K.pneumoniae* includes genes related to lipopolysaccharide synthesis (*wzm*, *wbbM*), type 3 pili biosynthesis (*mrkA*), and poly-β-1,6-N-acetyl-d-glucosamine (PNAG) polysaccharide secretion (*pgaA*); *P* < 0.01 (**), *P* < 0.001 (***), *P* < 0.0001 (****).

**
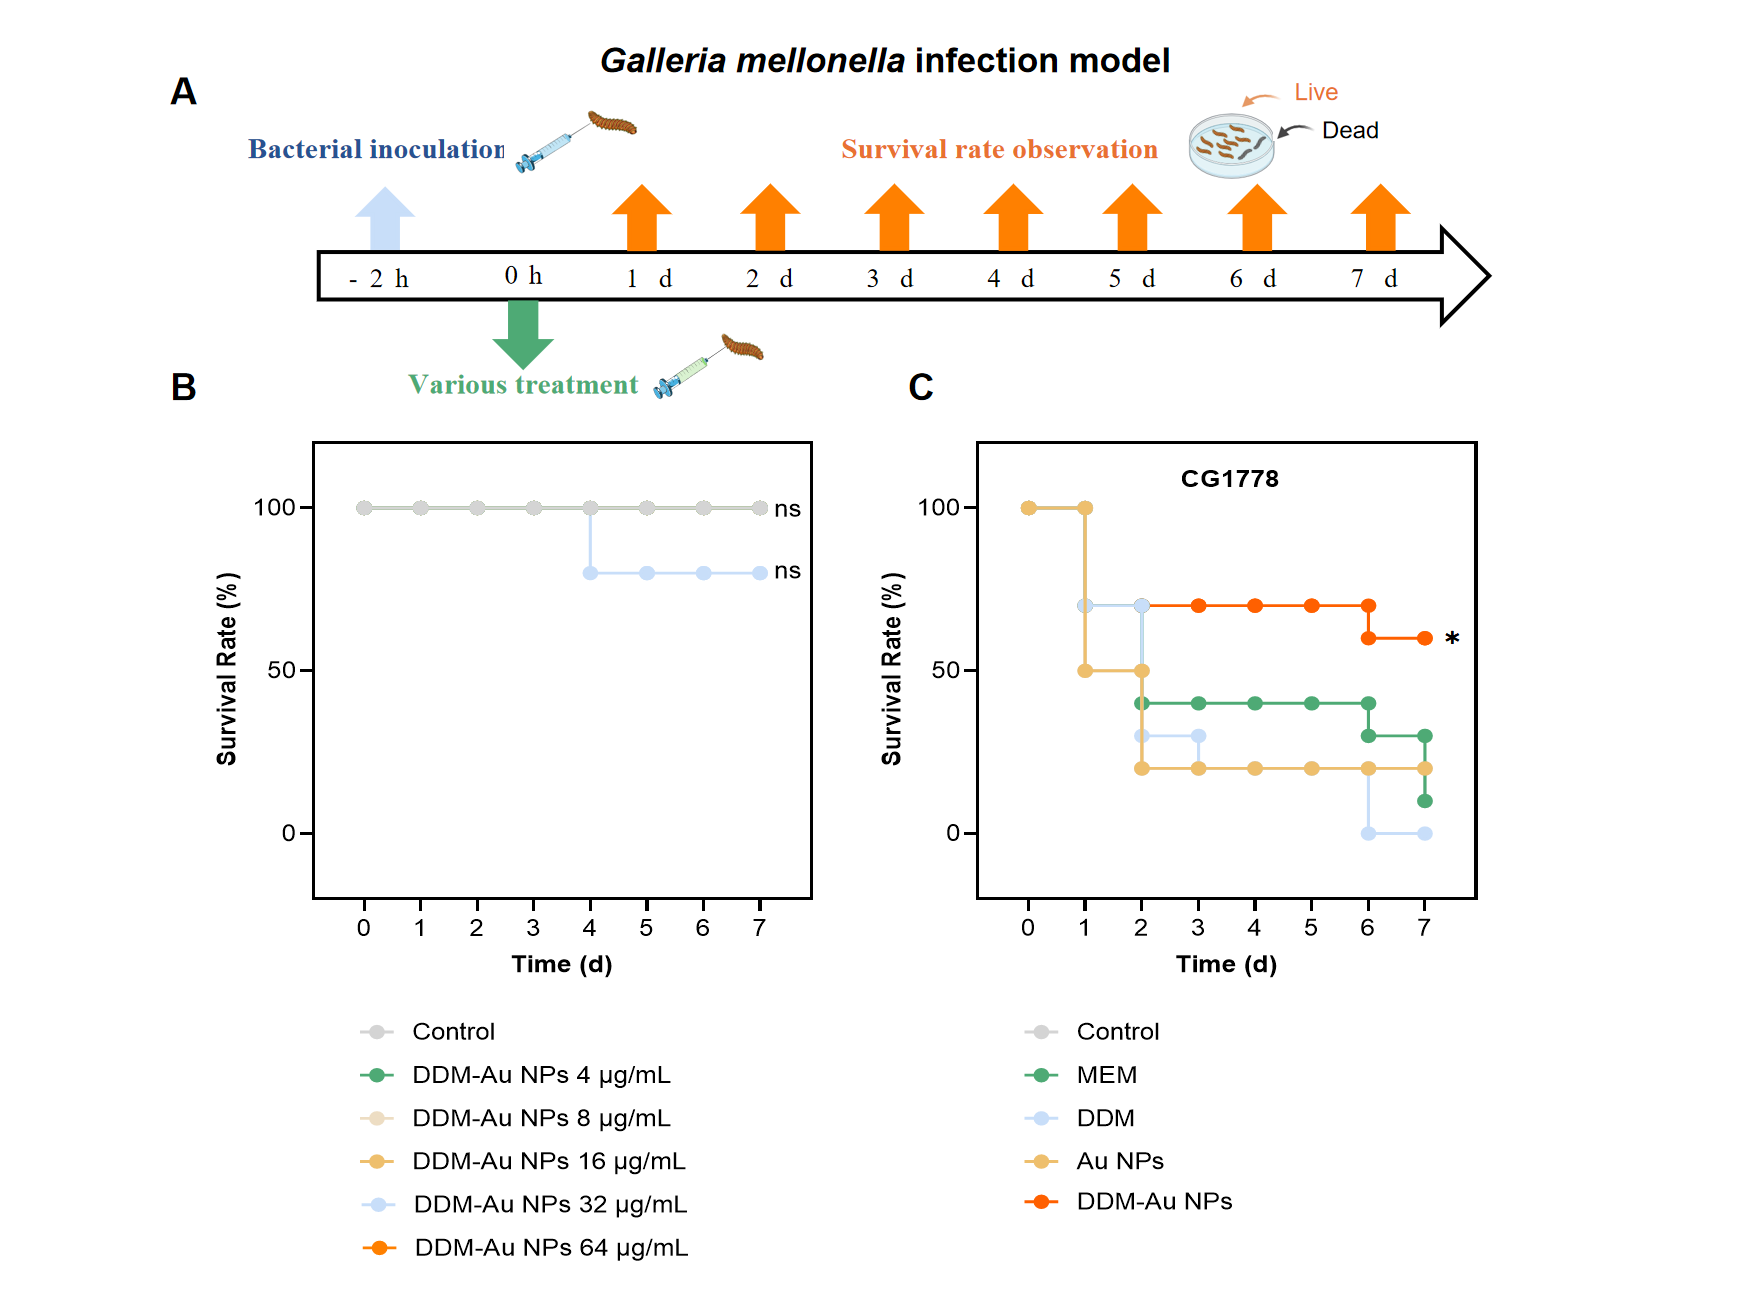
**

**Figure S5. Safety and infection model of the *Galleria mellonella* Larvae *in vivo*** (A) Experimental process; (B) Seven-day survival rate of Larvae following injection of various concentrations of DDM_Au NPs (n = 10); (C) Seven-day survival rate of Larvae after different treatments (n = 10); *P* > 0.05 (ns), **P* < 0.05.

**Reference**

1. Bai Y, Wang W, Shi M, et al., Novel Antibiofilm Inhibitor Ginkgetin as an Antibacterial Synergist against *Escherichia coli*. *Int J Mol Sci*.**2022**,23.

2. Elken EM, Tan ZN, Wang Q, et al., Impact of Sub-MIC Eugenol on *Klebsiella pneumoniae* Biofilm Formation via Upregulation of rcsB. *Front Vet Sci*.**2022**,9,945491.

3. Minogue TD, Daligault HA, Davenport KW, et al., Complete Genome Assembly of *Escherichia coli* ATCC 25922, a Serotype O6 Reference Strain. *Genome Announc*.**2014**,2.

4. Rasheed JK, Anderson GJ, Yigit H, et al., Characterization of the extended-spectrum beta-lactamase reference strain, *Klebsiella pneumoniae* K6 (ATCC 700603), which produces the novel enzyme SHV-18. *Antimicrob Agents Chemother*.**2000**,44,2382-2388.
